# Supplementary material
Source: MDPI journal article supplement (https://www.mdpi.com/2673-7140/3/1/19)
Supplement: s1 [file s1]

# Field Investigation into Tree Fates from Recent Apple Tree Decline: Abrupt Hydraulic Failure Versus Gradual Hydraulic Loss

**Supplementary table S1.** T-sum and moisture during May 1 – September 15 in 2019 and 2020 in the weather stations in proximity of the study sites.

| Study site | Weather station in proximity | T-sum (°C) |         |                    | Moisture deficit (mm) |      |                    |
|------------|------------------------------|------------|---------|--------------------|-----------------------|------|--------------------|
|            |                              | 2019       | 2020    | Historical average | 2019                  | 2020 | Historical average |
| A          | Summerland North             | 2404.65    | 2394.25 | 2458.18            | 611                   | 625  | 634                |
| S          | Summerland EC                | 2652.45    | 2548.9  | 2503.32            | 554                   | 559  | 585                |
| C          | Cawston                      | 2697.18    | 2506.99 | 2631.42            | 608                   | 590  | 615                |
| M, P       | Summerland South             | 2593.71    | 2580.6  | 2538.29            | 581                   | 598  | 583                |

Note: Data were obtained from the data sets of weather stations in proximity of the study sites from farmwest.com. T-sum is accumulated mean daily temperatures above 0 °C. Moisture deficit is evapotranspiration minus effective precipitation. Historical average is the mean of 1971-2020.
