# Supplementary material
Source: MDPI journal article supplement (https://www.mdpi.com/2673-7140/3/1/19)
Supplement: s1 [file s1]

Archive with 1 entries (1 files):
- stresses-2102208-supplementary.pdf
